# Supplementary material for: Galangin inhibits epithelial-mesenchymal transition and angiogenesis by downregulating CD44 in glioma
Source: PubMed Central journal article supplement (PMC6746128; doi:10.7150/jca.31487), 2019-07-25
Supplement: jcav10p4499s1.pdf [file jcav10p4499s1.pdf]

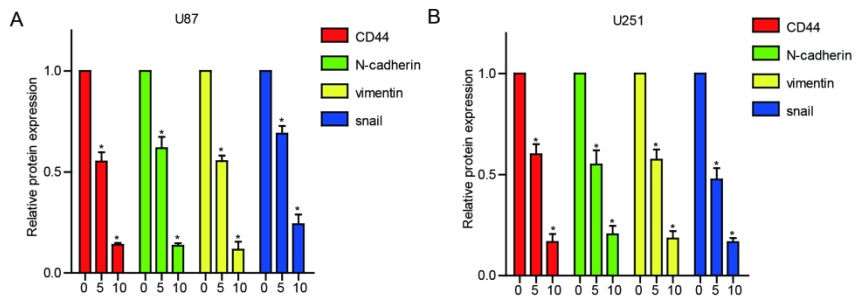

**Supplementary Figure 1.** The quantitative analysis of protein expression for Figure 1F.
